# Supplementary material
Source: PubMed Central journal article supplement (PMC4235583)
Supplement: supp_aru135_Negotiation_SOM_final.pdf [file supp_aru135_Negotiation_SOM_final.pdf]

## Supplementary Material

## Negotiation of territory boundaries in a songbird

Figures S1 through S5 and Table S1 referenced in the main text are shown here.

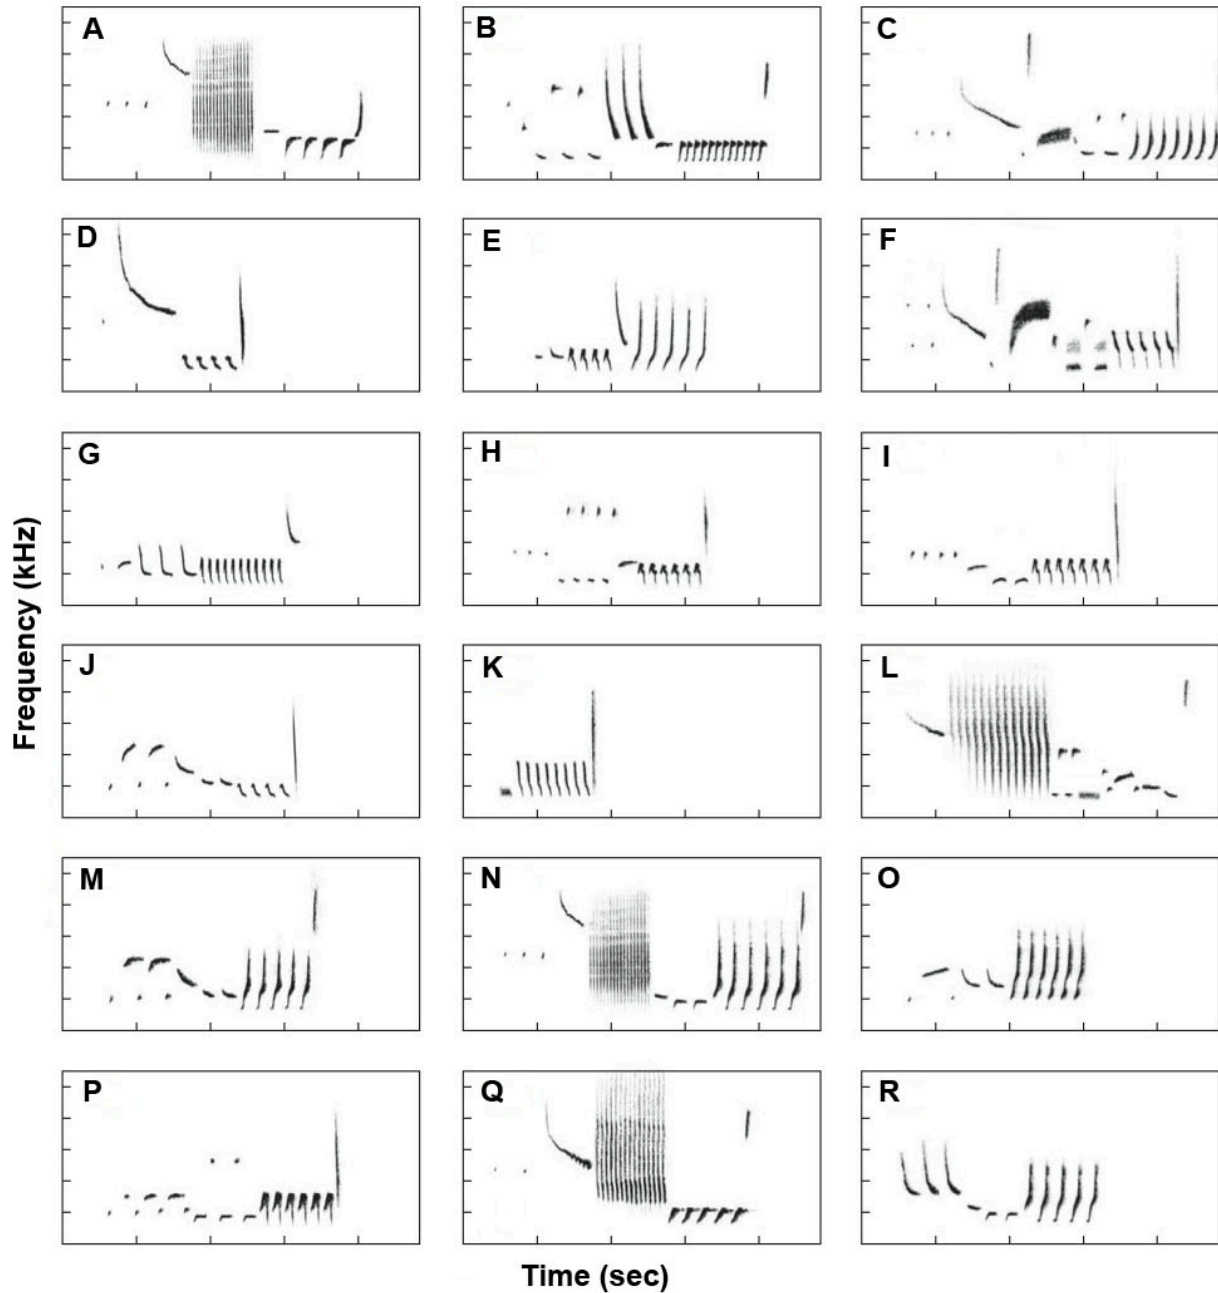

Figure S1. Partial repertoire of a banded wren male. Song types with a rattle: A, L, N and Q. Song types with a buzz: C and F. Song types with J-note trills: C, E, M, N, O and R. Song type P is often given in the presence of the female mate.

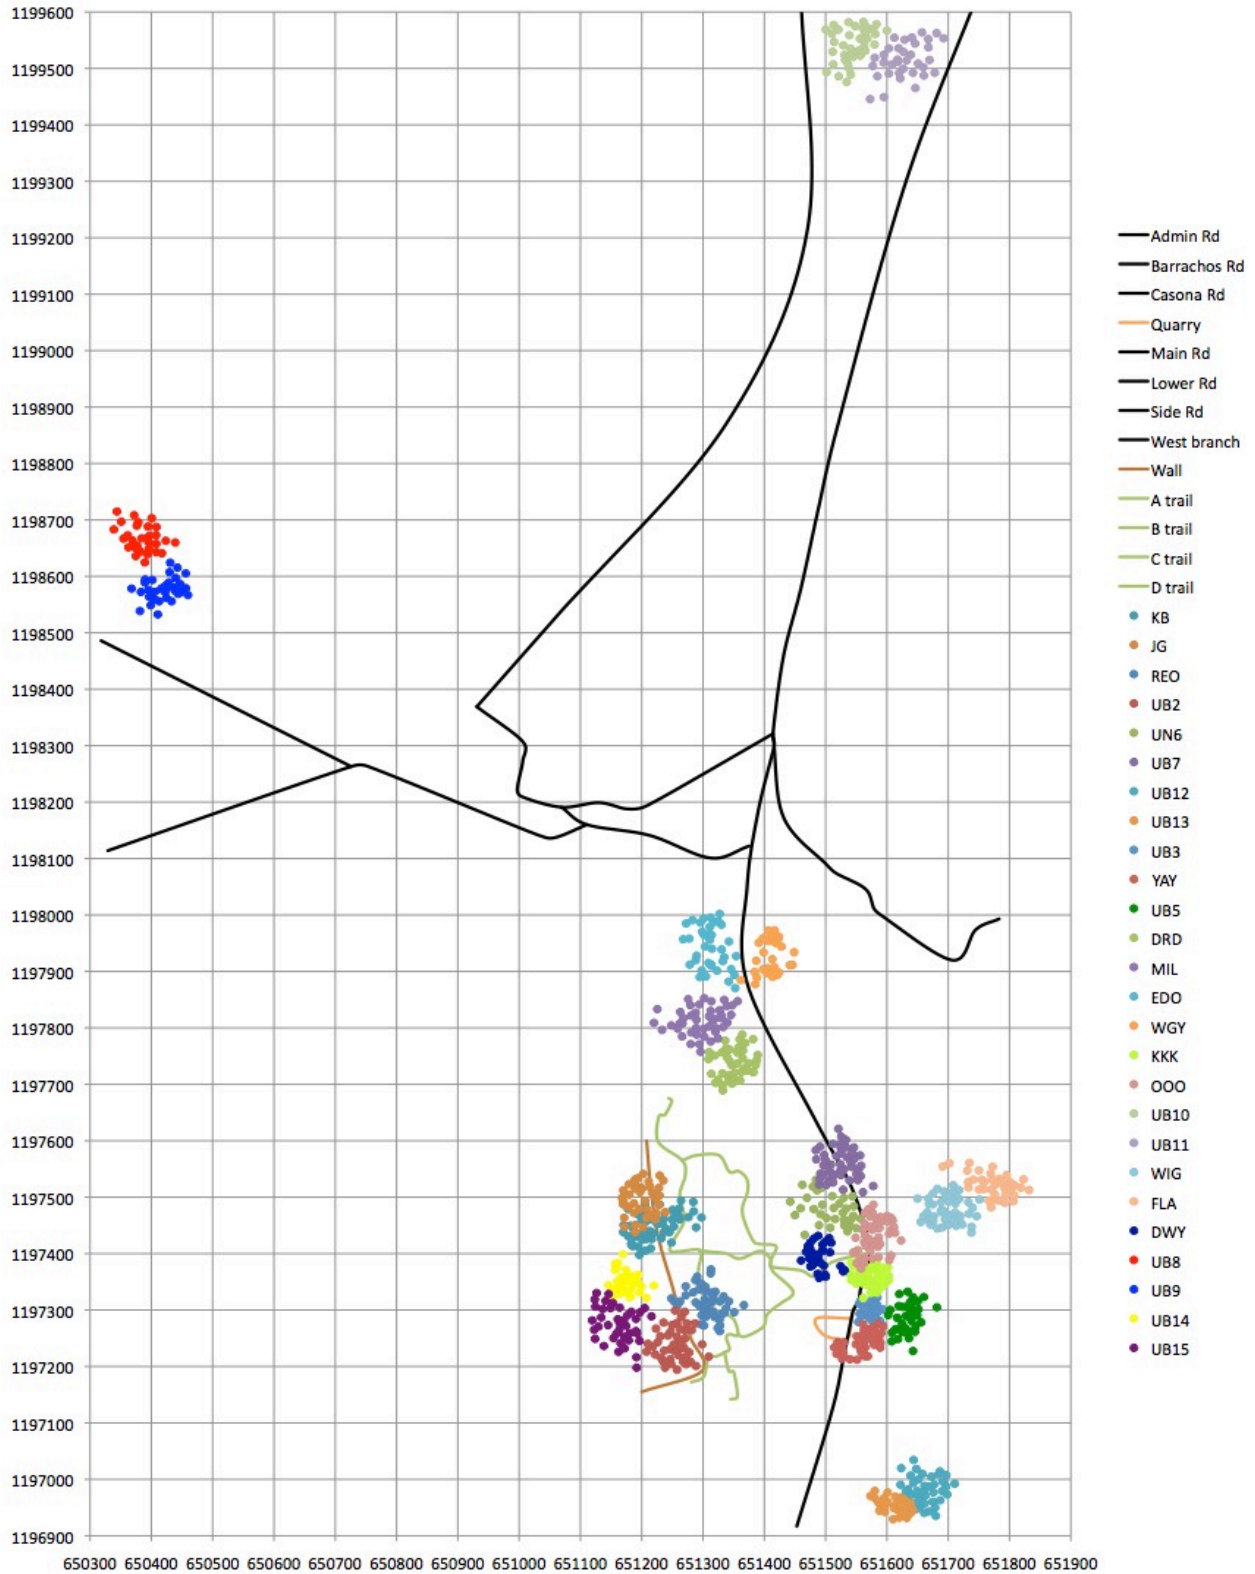

Figure S2 (above). Map of study area, showing major roads in the administrative area of Parque Nacional Santa Rosa in black, trails in green, and all flag locations for the 26 study males. Units are latitude and longitude in UTM units, grid squares are 100 by 100 meters.

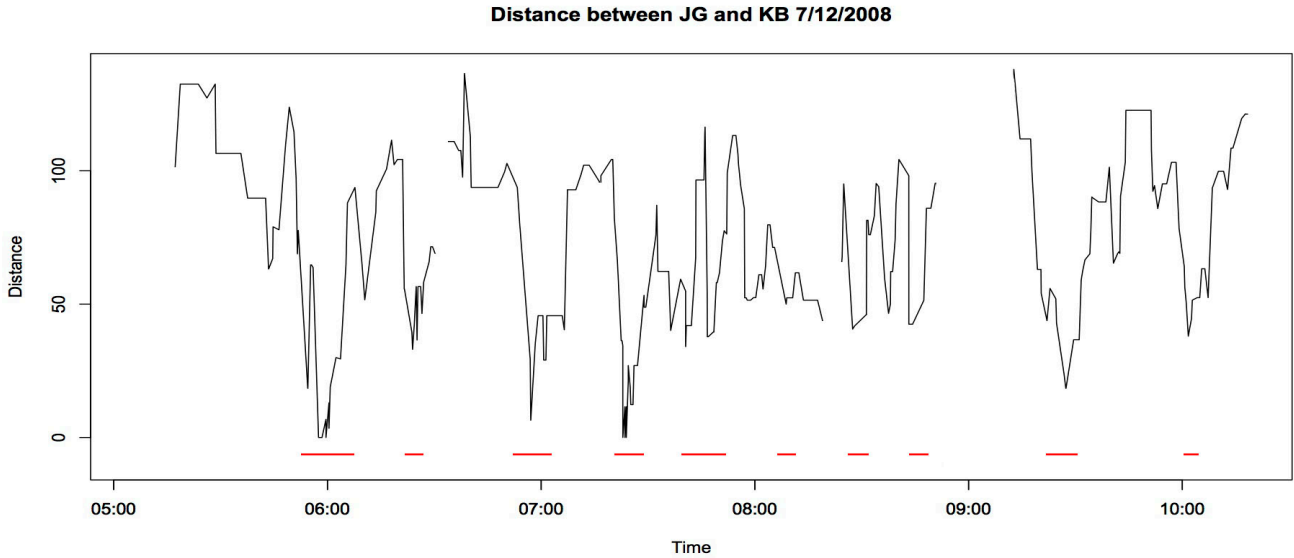

Figure S3. Example plot of distance between males for one day of recording. Red lines demarcate the during period of identified interactions, two of which involved a fight. Times with no distance line occur when the location of one bird is unknown or when observers took a break.

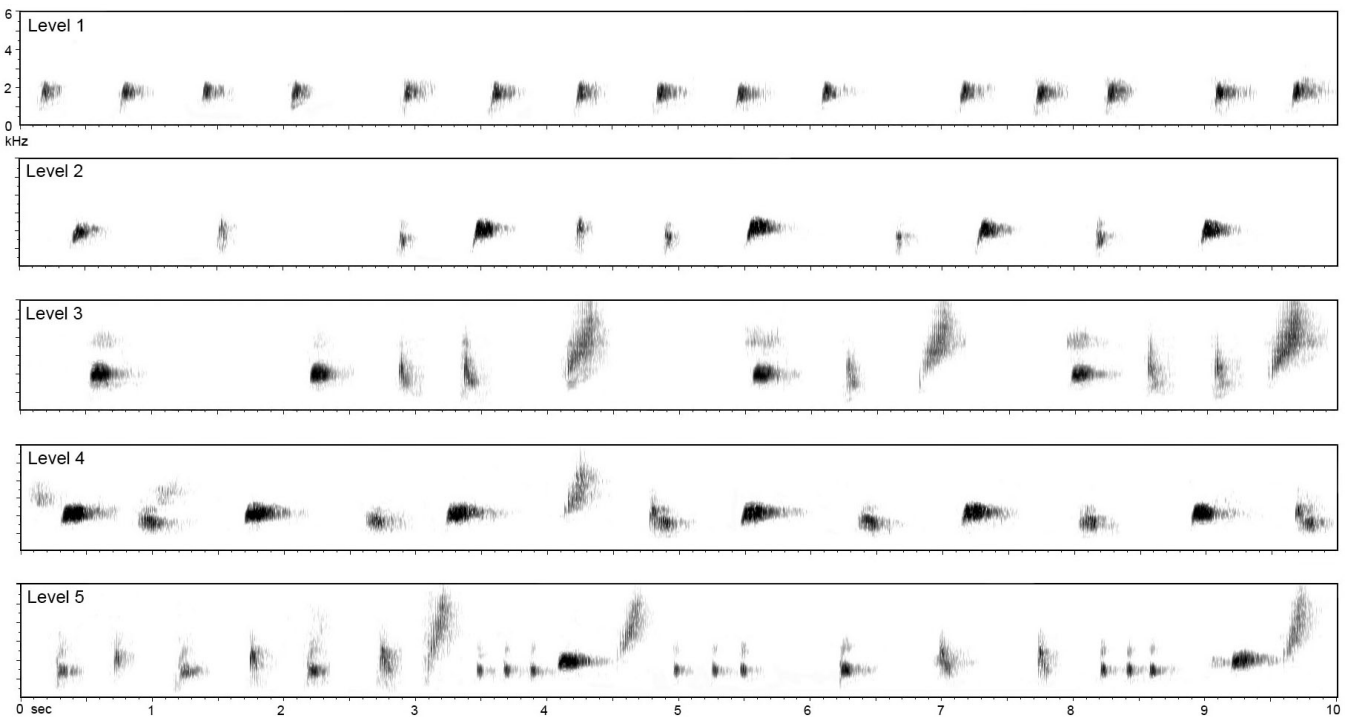

Figure S4. Examples of grunting intensity levels. The primary criterion for our designation of level was the number of different note types: 1 note for level 1, 2 for level 2, etc. Higher intensity grunt bouts tended to contain the higher frequency buzz notes that are similar to those incorporated into some song types. Spectrograms were band-pass filtered and cleaned of non-wren sounds for clarity. Spectrogram settings: FFT size = 512, frequency resolution 93.8 Hz, time resolution 3.13 ms, Hann window.

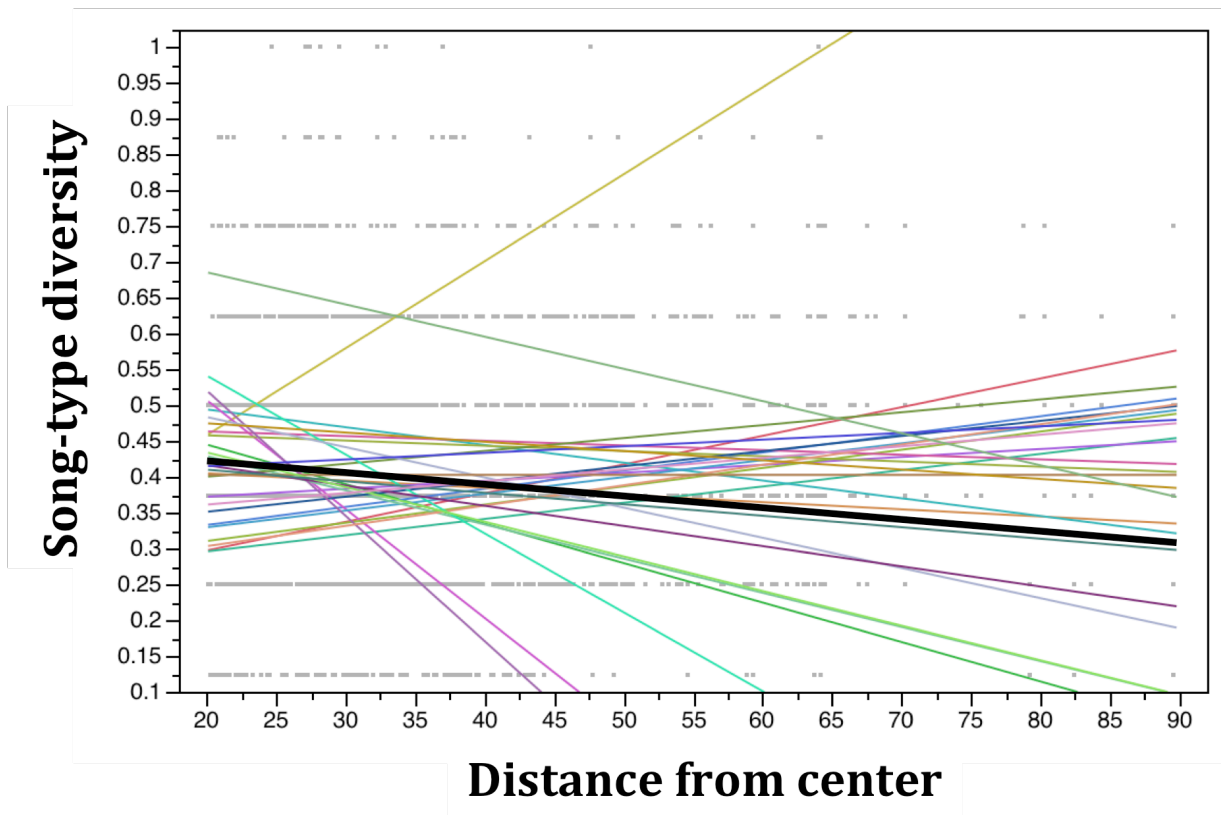

Figure S5. Graph of song-type diversity as a function of distance of the male from the center of his territory (meters). Colored lines show slope estimates for individual males based on results generated by the ANCOVA analysis; heavy black line shows overall mean slope.

Table S1. Dyad and bird statistics, including inclusive dates recorded (mm/dd), territory overlap, number of interactions, maximum escalation level, song-type sharing index, birdID, repertoire size, fraction rattle-buzz song types, fraction of times male was the instigator, general aggressive status (aggressor or defender), breeding stage, the song-type diversity versus distance slope, and territory size (maximum length in m).

| Pair | Dates       | Terr Ovr/rlp | Inter-actns | Max esc | Share index | Bird | Rep size | % rattle-buzz | % instig | Status | Br stage | Slope   | Terr size |
|------|-------------|--------------|-------------|---------|-------------|------|----------|---------------|----------|--------|----------|---------|-----------|
| 1    | 05/20-05/21 | Gap          | 4           | C       | 0.769       | DWY  | 19       | 0.421         | 0.75     | A      | C        | -0.004  | 74.8      |
|      |             |              |             |         |             | OOO  | 20       | 0.4           | 0.25     | D      | I        | -0.0137 | 91.6      |
| 2    | 05/23-05/27 | Abut         | 14          | G       | 0.851       | EDO  | 22       | 0.455         | 0.75     | A      | C        | 0.004   | 139.4     |
|      |             |              |             |         |             | WGY  | 25       | 0.56          | 0.25     | D      | C        | 0.0024  | 103.9     |
| 3    | 05/31-06/03 | Abut         | 19          | G       | 0.863       | REO  | 24       | 0.375         | 0.118    | D      | I        | 0.0038  | 119       |
|      |             |              |             |         |             | UB2  | 27       | 0.333         | 0.882    | A      | C        | 0.0033  | 105.1     |
| 4    | 06/05-06/07 | Overlap      | 22          | F       | 0.818       | UB3  | 22       | 0.364         | 0.591    | A      | C        | -0.0095 | 55.9      |
|      |             |              |             |         |             | YAY  | 22       | 0.409         | 0.409    | D      | I        | 0.0002  | 77.6      |
| 5    | 06/10-06/12 | Gap          | 10          | G       | 0.894       | UB5  | 24       | 0.417         | 0.556    | A      | C        | -0.0027 | 103.5     |
|      |             |              |             |         |             | YAY  | 23       | 0.391         | 0.444    | D      | C        | -0.0045 | 79.6      |
| 6    | 06/17-06/19 | Overlap      | 22          | F       | 0.878       | UB6  | 20       | 0.5           | 0.318    | D      | C        | -0.0013 | 118.8     |
|      |             |              |             |         |             | UB7  | 21       | 0.476         | 0.682    | A      | C        | 0.0015  | 119.2     |
| 7    | 06/21-06/24 | Gap          | 10          | G       | 0.683       | UB8  | 18       | 0.333         | 0.778    | A      | C        | -0.0033 | 109.7     |
|      |             |              |             |         |             | UB9  | 23       | 0.391         | 0.222    | D      | N        | -0.0001 | 98.9      |
| 8    | 06/26-06/28 | Gap          | 17          | G       | 0.875       | UB10 | 22       | 0.409         | 0.25     | D      | N        | 0.0008  | 110.1     |
|      |             |              |             |         |             | UB11 | 26       | 0.423         | 0.75     | A      | I        | 0.0008  | 161.3     |
| 9    | 07/01-07/03 | Overlap      | 22          | F       | 0.900       | UB12 | 19       | 0.474         | 0.591    | D      | C        | -0.0033 | 105.6     |
|      |             |              |             |         |             | UB13 | 21       | 0.429         | 0.409    | A      | C        | 0.0036  | 73.7      |
| 10   | 07/04-07/06 | Overlap      | 26          | F       | 0.667       | UB14 | 17       | 0.529         | 0.083    | D      | I        | -0.016  | 83.8      |
|      |             |              |             |         |             | UB15 | 28       | 0.5           | 0.917    | A      | I        | 0.0043  | 147.5     |
| 11   | 07/11-07/13 | Overlap      | 19          | F       | 0.857       | JG   | 21       | 0.476         | 0.842    | A      | C        | 0.0038  | 114.9     |
|      |             |              |             |         |             | KB   | 21       | 0.476         | 0.158    | D      | I        | 0.0026  | 125.9     |
| 12   | 07/16-07/19 | Abut         | 9           | G       | 0.684       | FLA  | 18       | 0.556         | 0.333    | D      | I        | 0.0005  | 146.8     |
|      |             |              |             |         |             | WIG  | 20       | 0.4           | 0.667    | A      | C        | 0.0031  | 106.8     |
| 13   | 07/20-07/22 | Abut         | 12          | G       | 0.703       | DRD  | 16       | 0.5           | 0.818    | A      | N        | 0.0055  | 103.6     |
|      |             |              |             |         |             | MIL  | 21       | 0.476         | 0.182    | D      | C        | -0.001  | 141.9     |
| 14   | 07/25-07/27 | Overlap      | 8           | F       | 0.64        | KKK  | 19       | 0.474         | 0.875    | A      | C        | 0.0136  | 85.2      |
|      |             |              |             |         |             | OOO  | 22       | 0.409         | 0.125    | D      | N        | 0.004   | 114.9     |
